# Supplementary material for: Localization and Characterization of Ferritin in Demospongiae: A Possible Role on Spiculogenesis
Source: Mar Drugs. 2014 Aug 22;12(8):4659–76. doi: 10.3390/md12084659 (PMC4145336; doi:10.3390/md12084659)

## Supplementary Information

**Figure S1.** Control experiments of immunostaining of *S. domuncula* tissue cross-sections. Sections were treated with blocking solution (PBS/BSA 0.3%, 1 h RT) and Cy3-labelled secondary antibody (1 h, RT). (a) Light microscope image and (b) corresponding fluorescent image showing no signal. Scale bar: 100  $\mu\text{m}$ .

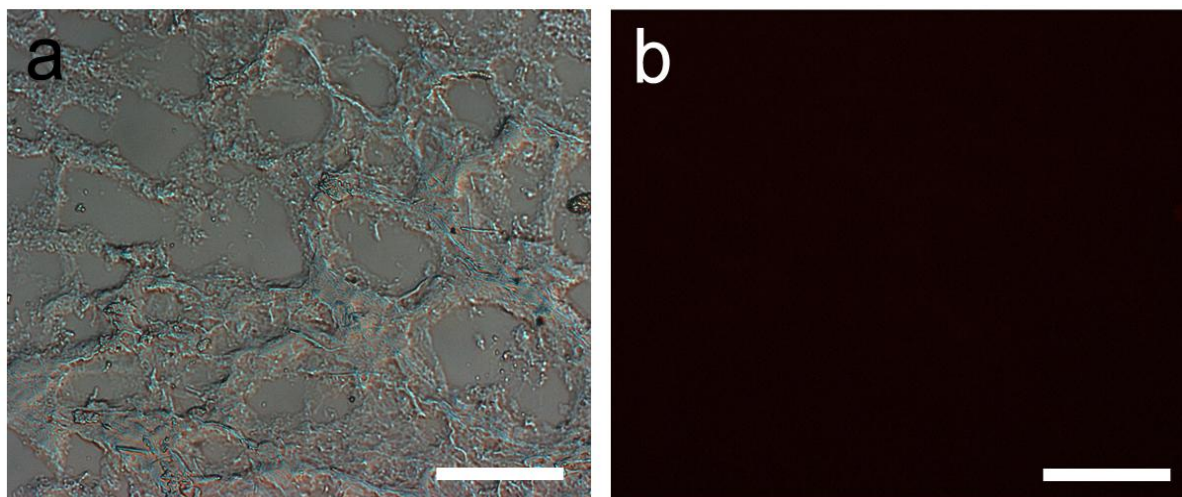

**Figure S2.** Light microscope images of *S. domuncula* tissue cross-sections after staining with Perls' Prussian Blue solution. Small spheres dispersed throughout tissue cross-sections are clearly observed.

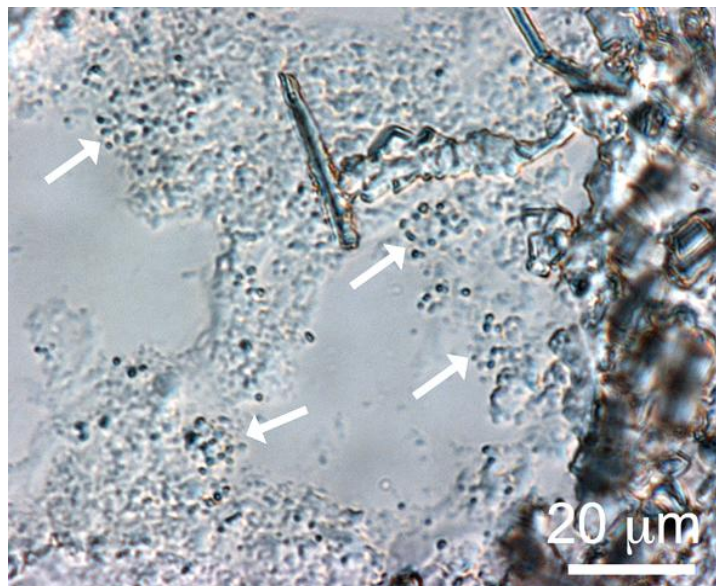

Supplement: Supplementary File 1 [file marinedrugs-12-04659-s001.pdf]
